# Supplementary material for: A new 2D layered aluminophosphate |Hada|6[Al6(PO4)8](H2O)11 supported highly uniform Ag nanoparticles for 4-nitrophenol reduction
Source: Royal Society of Chemistry journal article supplement (doi:10.1039/d1qi00739d), 2021-11-12
Supplement: d1qi00739d1.pdf [file d1qi00739d1.pdf]

## Supporting Information

# A New 2D Layered Aluminophosphate $[\text{Hada}]_6[\text{Al}_6(\text{PO}_4)_8](\text{H}_2\text{O})_{11}$ Supported Highly Uniform Ag Nanoparticles for 4-Nitrophenol Reduction

Jiang-Zhen Qiu,<sup>\*a</sup> Long-Fei Wang,<sup>b</sup> Xu-Gang Shu,<sup>a</sup> Cui-Jin Li,<sup>a</sup> Zhongke Yuan<sup>b</sup> and Jiuxing Jiang<sup>\*b</sup>

<sup>a</sup>College of Chemistry and Chemical Engineering, Zhongkai University of Agriculture and Engineering, Guangzhou 510225, P. R. China.

<sup>b</sup>MOE Key Laboratory of Bioinorganic and Synthetic Chemistry, School of Chemistry, Sun Yat-sen University, Guangzhou 510275, P. R. China.

### Table of contents

|                                                                                                                                                                  |    |
|------------------------------------------------------------------------------------------------------------------------------------------------------------------|----|
| Experimental Section.....                                                                                                                                        | 2  |
| Scheme S1. Synthesis of the 3,5, <i>N,N</i> -tetramethyladamantane-1-amine.....                                                                                  | 2  |
| Figure S1. A comparison of the XRD patterns of ZHKU-1, Ag@ZHKU-1, ZHKU-1-Cal, Ag@ZHKU-1-Cal.....                                                                 | 4  |
| Figure S2. The solid-state <sup>13</sup> C MAS NMR and the <sup>13</sup> C liquid NMR of synthetic protonated 3,5, <i>N,N</i> -tetramethyladamantane-1-mine..... | 5  |
| Figure S3. The high-resolution SEM and TEM images.....                                                                                                           | 6  |
| Figure S4. The IR spectrum of ZHKU-1 in the range of 400-4000 cm <sup>-1</sup> .....                                                                             | 7  |
| Figure S5. <sup>31</sup> P and <sup>27</sup> Al magic angle spinning (MAS) NMR spectra of ZHKU-1.....                                                            | 8  |
| Figure S6. The enlarged view of figure 4b.....                                                                                                                   | 9  |
| Figure S7. The different layers between ZHKU-1 and SYSU-6.....                                                                                                   | 10 |
| Figure S8. Raman spectra excited with 785 nm of ZHKU-1 and Ag@ZHKU-1 with the range of 100–1500 cm <sup>-1</sup> .....                                           | 11 |
| Figure S9. Time-dependent UV-vis absorption of 4-NP with NaBH <sub>4</sub> alone in the absence of Ag@ZHKU-1 catalyst.....                                       | 12 |
| Table S1. Comparison of ZHKU-1 with SYSU-1.....                                                                                                                  | 13 |
| Table S2. Summary of 4,6,12-net layered aluminophosphates for the same coordination sequence with Al:P = 3:4.....                                                | 14 |
| Table S3. The Atoms Fractional Atomic Coordinates (×10 <sup>4</sup> ) for ZHKU-1.....                                                                            | 15 |
| References.....                                                                                                                                                  | 20 |

## Experimental Section

**Synthesis of 3,5,*N,N*-tetramethyladamantane-1-amine (ada).** The synthesis route of *N,N*,*N,N*-dimethylmemantin-1-amine is shown in Scheme S1. The details of synthesis of *N,N*,*N,N*-dimethylmemantin-1-amine is reported in our previous work.<sup>[1]</sup>

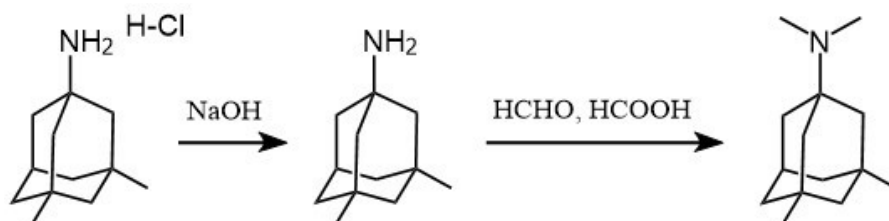

**Scheme S1.** Synthesis of 3,5,*N,N*-tetramethyladamantane-1-amine.

**Synthesis of ZHKU-1.** The aluminophosphate of ZHKU-1 was obtained using ada as template molecule with the following gel composition: Al<sub>2</sub>O<sub>3</sub>:(1.3-1.4) P<sub>2</sub>O<sub>5</sub>:(0.5-0.6) ada:(20-30) H<sub>2</sub>O. In a typical synthesis, 0.65 g orthophosphoric acid (85 wt% H<sub>3</sub>PO<sub>4</sub>, Aladdin), 4.50 g deionized water, and 0.32 g boehmite (Catapal B, 70.3% Al<sub>2</sub>O<sub>3</sub>, Letai) were mixed to the Teflon liner container. After stirring for 2 hours, 1.25 g ada was added to the mixture, and the final gel was sealed in the autoclave. After hydrothermal crystallization at 150 °C for three days in static conditions, colorless block crystals were formed. Elemental analysis (%) calcd for ZHKU-1: C 42.57, N 3.54, H 7.57; found: C 42.36, N 3.45, H 7.40.

**Synthesis of Ag@ZHKU-1.** In a typical run, 0.3 g ZHKU-1 sample was added to 13.9 mL AgNO<sub>3</sub> (0.01 M) solution. Then, under the UV light (LED, *P* = 12 W,  $\lambda$  = 365 nm) irradiation, the mixture was stirring for 2 hours. The suspension was filtrated and washed by water several times, giving Ag NPs supported material named Ag@ZHKU-1.

**Catalytic reduction of 4-NP.** 5 mL 4-NP (3.0 mM) aqueous solution was mixed with 25 mL distilled water in the weighing bottle. Then 5 mL NaBH<sub>4</sub> aqueous solution (0.3 M) was added, and the solution immediately turned to the deep-yellow solution. After the catalyst of Ag@ZHKU-1 (10.0 mg) was added, a conversion of the 4-NP to 4-AP was rapidly triggered at room temperature. Time-dependent UV-vis spectroscopy was used to record the whole reaction progress.

**Characterization.** X-ray single-crystal diffraction data of ZHKU-1 were collected on a diffractometer (Bruker D8 QUEST) using Mo- $K_{\alpha}$  radiation ( $\lambda = 0.71073 \text{ \AA}$ ) radiation at 120 K with a Bruker cooling system under a  $N_2$  flow. The single crystal of ZHKU-1 was mounted in a loop. The crystal structures were solved by direct methods, and all non-hydrogen atoms were refined anisotropically by least-squares on  $F^2$  using the SHELXTL 2014 and Olex 2 program. Hydrogen atoms on organic ligands were generated by the riding mode. The Cambridge Crystallographic Data Centre (CCDC) number is 2034965 for ZHKU-1. The data could be obtained free of charge from the via [www.ccdc.cam.ac.uk/data\\_request/cif](http://www.ccdc.cam.ac.uk/data_request/cif) (or from Cambridge Crystallographic Data Centre, 12 Union Road, Cambridge CB21EZ, UK; fax: (+44)1223-336-033).

XRD was collected using a Rigaku SmartLab diffractometer equipped with a rotating anode (Cu  $K\alpha_1$  radiation,  $\lambda = 1.5406 \text{ \AA}$ ). SEM images and high-resolution SEM were operated on an FEI Quanta 400 Thermal Field Emission Environmental SEM and GeminiSEM500 Field-Emission-SEM, respectively. HRTEM images, HAADF-STEM images, and corresponding EDX are acquired on a JEOL, JEM-ARM200P operating at 200 kV. The liquid  $^{13}\text{C}$ -NMR spectrum was collected on a Bruker advance III 400MHz spectrometer and the solid-state  $^{27}\text{Al}$ ,  $^{31}\text{P}$ , and  $^{13}\text{C}$  MAS NMR spectra on a Bruker Advance 400 spectrometer with 79.49 MHz. The infrared (IR) spectrum was collected on Thermo Scientific Nicolet 6700 Fourier transform infrared spectroscopy. ICP-OES was obtained on an Optima 8300 spectrometer, Elemental analysis on a Vario EL Cube elemental analyzer., and the Raman spectra on inVia Qontor spectrometer. UV-vis spectroscopy was collected with a PerkinElmer UV750 spectrophotometer.  $N_2$  adsorption was measured on a JWGB JW-BK200C instrument.

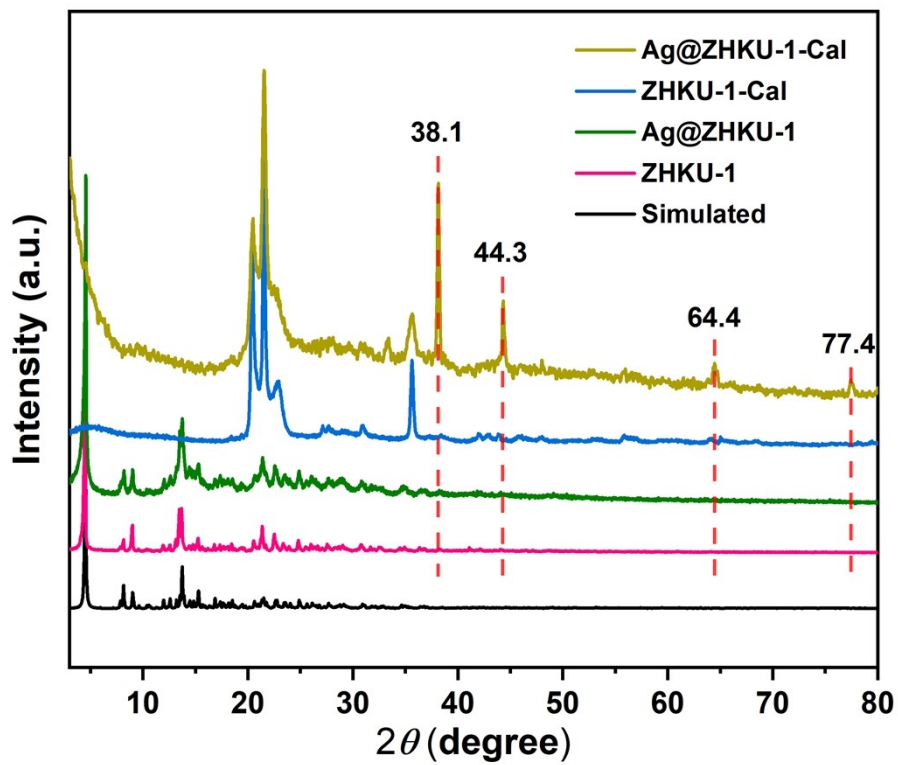

**Figure S1.** A comparison of the XRD patterns of ZHKU-1, Ag@ZHKU-1, ZHKU-1-Cal, Ag@ZHKU-1-Cal.

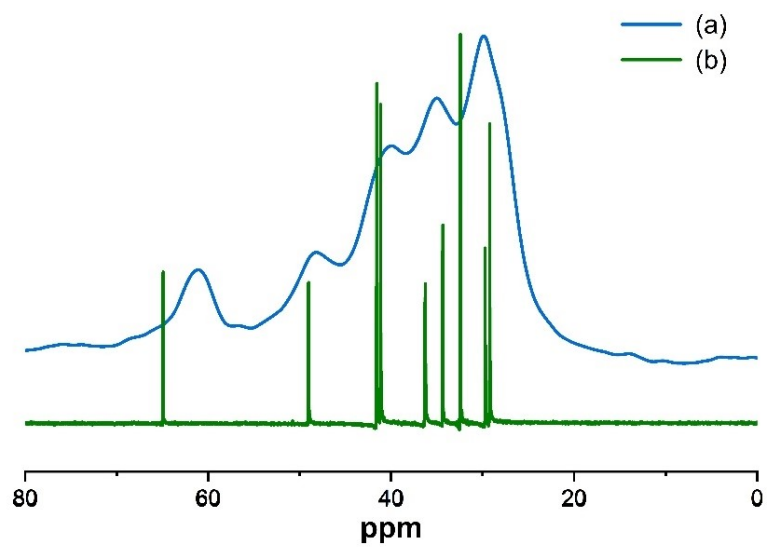

**Figure S2.** (a) The solid-state <sup>13</sup>C MAS NMR of ZHKU-1; (b) The <sup>13</sup>C liquid NMR of synthetic protonated 3,5,N,N-tetramethyladamantane-1-amine which was dissolved with concentrated HCl aqueous solution.

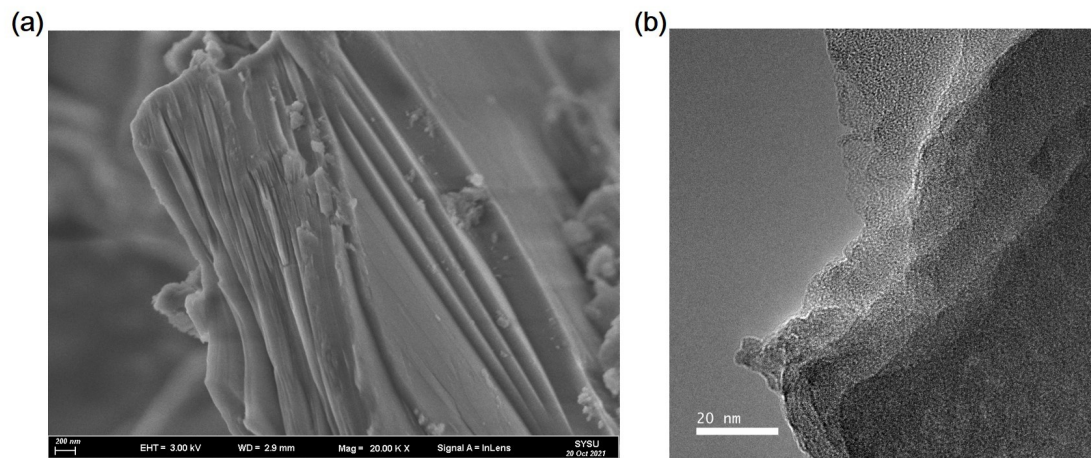

**Figure S3.** The high-resolution SEM (a) and TEM images (b).

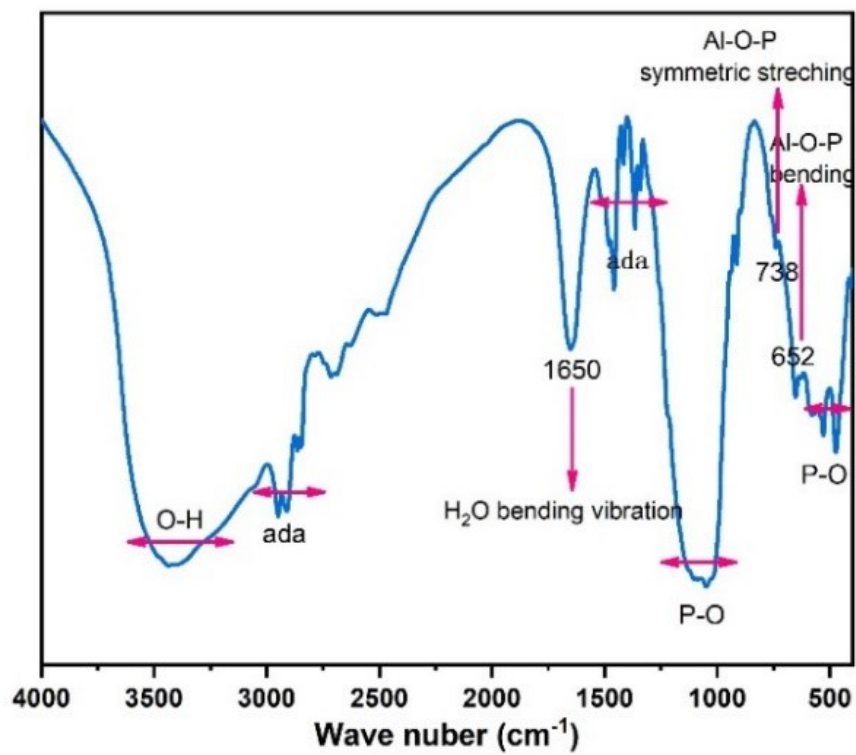

**Figure S4.** The IR spectrum of ZHKU-1 in the range of 400-4000 cm<sup>-1</sup>.

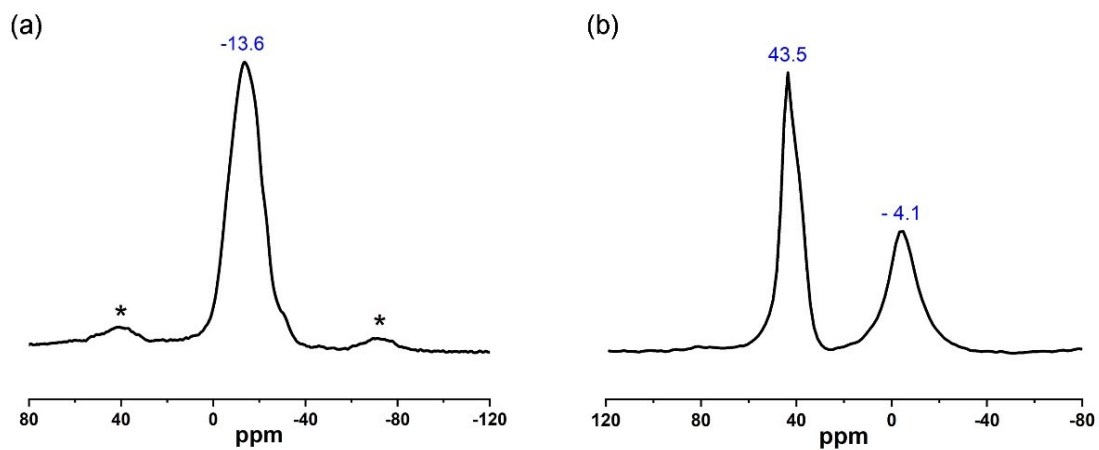

**Figure S5.** (a)  $^{31}\text{P}$  magic angle spinning (MAS) NMR spectra of ZHKU-1. Asterisks (\*) denote the spinning sidebands. (b)  $^{27}\text{Al}$  MAS NMR spectra of ZHKU-1.



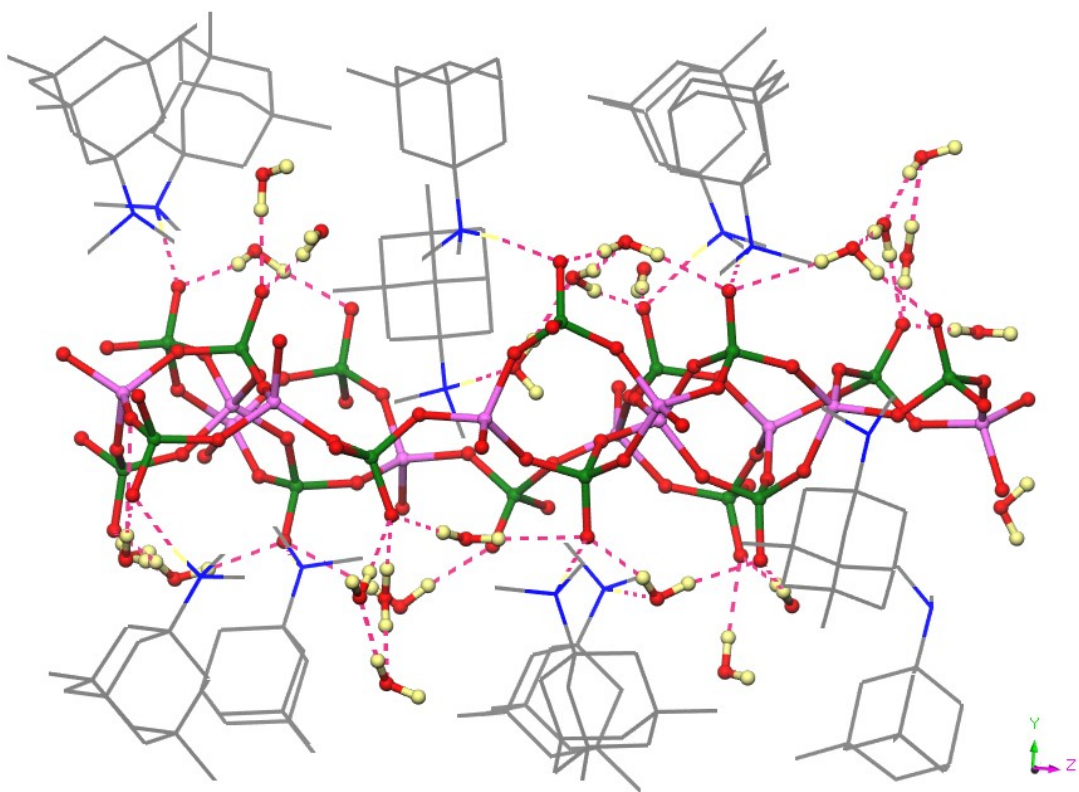

**Figure S6.** An enlarged view of figure 3b.

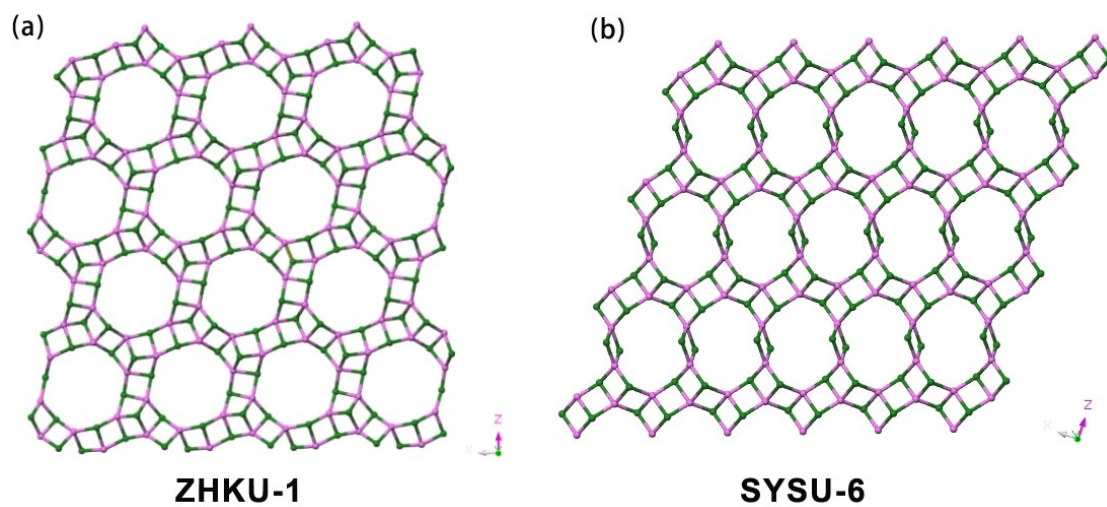

**Figure S7.** The different layers between ZHKU-1 (a) and SYSU-6 (b).

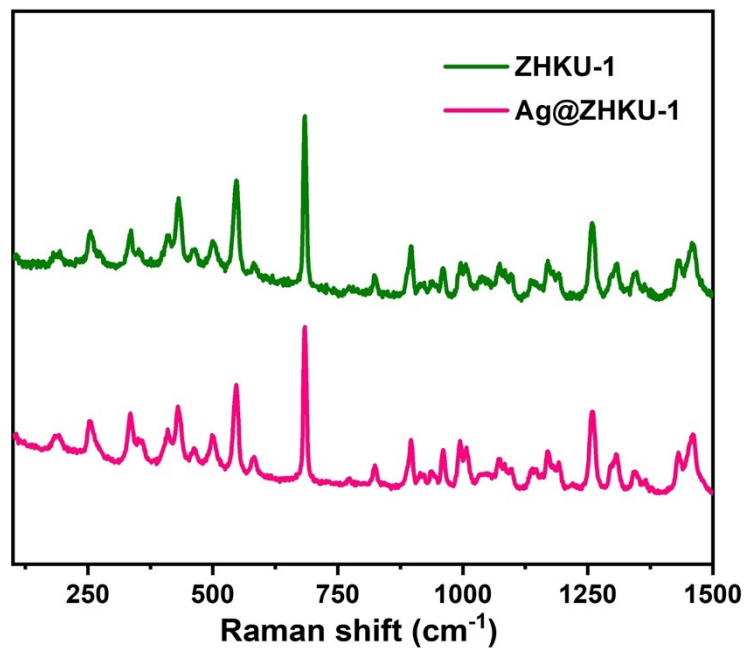

**Figure S8.** Raman spectra excited with 785 nm of ZHKU-1 and Ag@ZHKU-1 in the range of 100–1500 cm<sup>-1</sup>.

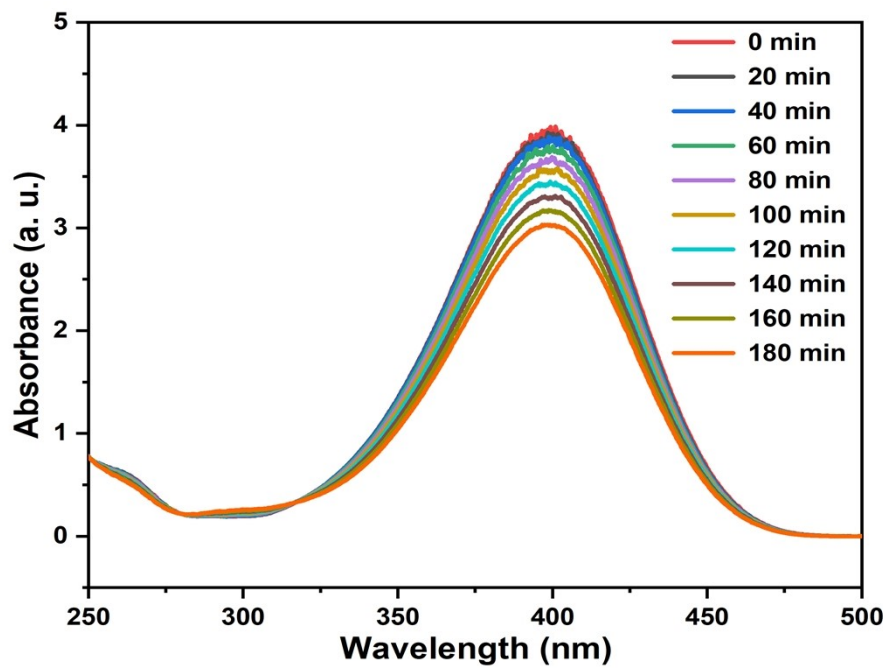

**Figure S9.** Time-dependent UV-vis absorption of 4-NP with NaBH<sub>4</sub> alone in the absence of Ag@ZHKU-1 catalyst.

**Table S1.** Comparison of ZHKU-1 with SYSU-1.

| Name                  | Formula                                                                | Coordination Sequence                                                                                                           | Stacking Sequence | Ring Size |
|-----------------------|------------------------------------------------------------------------|---------------------------------------------------------------------------------------------------------------------------------|-------------------|-----------|
| SYSU-6                | $ \text{Hada} _2[\text{Al}_2(\text{HPO}_4)(\text{PO}_4)_2]$            | 2 5 6 12 12 20 12<br>24 20 32<br>3 7 6 12 10 19 16<br>26 18 31<br>4 4 8 9 18 12 20<br>17 30 22<br>4 5 10 7 14 14 24<br>17 28 19 | AB                | 4,12      |
| ZHKU-1<br>(this work) | $ \text{Hada} _6[\text{Al}_6(\text{PO}_4)_8](\text{H}_2\text{O})_{11}$ | 3 6 6 12 12 21 18<br>24 21 33<br>3 7 7 12 12 20 17<br>25 21 32<br>4 5 9 9 16 15 23<br>19 28 24                                  | AAAA              | 4,6,12    |

**Table S2.** Summary of 4,6,12-net layered aluminophosphates for the same coordination sequence with Al:P = 3:4.

| Name                      | Formula and OSDA                                                                                                                            | Coordination Sequence                                                                          | stacking sequence |
|---------------------------|---------------------------------------------------------------------------------------------------------------------------------------------|------------------------------------------------------------------------------------------------|-------------------|
| 2.3.4.143.001<br>APMeP150 | $[(C_5N_2H_{14})_3(H_2O)_{10}][Al_6P_8O_{32}(H_2O)_2]$<br>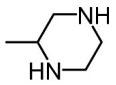 | 3 7 7 12 12 20 17<br>25 21 32<br>3 6 6 12 12 21 18<br>24 21 33<br>4 5 9 9 16 15 23<br>19 28 24 | AAAA              |
| 2.3.4.147.001             | $[BuNH_3]_3[Al_3P_4O_{16}]$<br>                            | 3 7 7 12 12 20 17<br>25 21 32<br>3 6 6 12 12 21 18<br>24 21 33<br>4 5 9 9 16 15 23<br>19 28 24 | AAAA              |
| 2.3.4.148.001             | $[NH_3CH_2CH(OH)CH_3]_3[Al_3P_4O_{16}]$<br>              | 3 7 7 12 12 20 17<br>25 21 32<br>3 6 6 12 12 21 18<br>24 21 33<br>4 5 9 9 16 15 23<br>19 28 24 | ABCABC            |
| 2.3.4.165.001             | $[Al_3P_4O_{16}][1.5NH_3(CH_2)_4NH_3]$<br>               | 3 7 7 12 12 20 17<br>25 21 32<br>3 6 6 12 12 21 18<br>24 21 33<br>4 5 9 9 16 15 23<br>19 28 24 | ABCABC            |
| ZHKU-1                    | $[Hada]_6[Al_6(PO_4)_8](H_2O)_{11}$<br>                  | 3 7 7 12 12 20 17<br>25 21 32<br>3 6 6 12 12 21 18<br>24 21 33<br>4 5 9 9 16 15 23<br>19 28 24 | AAAA              |

**Table S3.** Al, P, N, O, and C Atoms Fractional Atomic Coordinates ( $\times 10^4$ ) for ZHKU-1.

| Atom | x          | y         | z          |
|------|------------|-----------|------------|
| P1   | -2376.8(8) | 7928.6(3) | 4298.1(4)  |
| P2   | 1365.5(8)  | 7852.3(3) | 5529.8(4)  |
| P3   | -244.7(8)  | 7055.2(3) | 4518.6(4)  |
| P4   | 1224.1(8)  | 7790.8(3) | 3221.4(4)  |
| P5   | 3901.1(8)  | 7108.3(3) | 3889.6(4)  |
| P6   | 5028.0(8)  | 7917.0(3) | 2598.1(4)  |
| P7   | 3742.0(8)  | 7076.4(3) | 1543.5(4)  |
| P8   | 7359.6(8)  | 7093.7(3) | 2817.0(4)  |
| Al1  | -912.0(9)  | 7660.5(3) | 5314.9(5)  |
| Al2  | -973.0(9)  | 7514.7(3) | 3447.9(5)  |
| Al3  | 1845.1(9)  | 7452.5(3) | 4422.1(5)  |
| Al4  | 3135.3(9)  | 7406.4(3) | 2684.4(5)  |
| Al5  | 5922.7(9)  | 7497.9(3) | 3667.7(5)  |
| Al6  | 5902.8(9)  | 7350.9(3) | 1796.5(5)  |
| O1   | -2721(2)   | 8291.4(7) | 4254.5(12) |
| O2   | -3285(2)   | 7673.5(7) | 4224.3(11) |
| O3   | -1893(2)   | 7859.5(7) | 4912.5(11) |
| O4   | -1568(2)   | 7844.7(7) | 3828.9(12) |
| O5   | 1792(3)    | 8187.7(8) | 5690.6(13) |
| O6   | 263(2)     | 7877.4(7) | 5239.4(11) |
| O7   | 1278(2)    | 7606.3(7) | 6064.8(12) |
| O8   | 2062(2)    | 7666.9(8) | 5079.5(11) |
| O9   | -740(2)    | 7249.1(7) | 5033.3(12) |
| O10  | -711(2)    | 7183.8(7) | 3931.3(12) |
| O11  | -419(2)    | 6678.8(7) | 4583.7(11) |
| O12  | 922(2)     | 7132.4(8) | 4515.4(13) |
| O13  | 1383(2)    | 8146.6(7) | 3031.0(13) |
| O14  | 107(2)     | 7667.4(8) | 3097.6(12) |
| O15  | 1431(2)    | 7743.7(8) | 3893.6(11) |
| O16  | 1915(2)    | 7532.4(8) | 2896.0(12) |

|      |          |            |            |
|------|----------|------------|------------|
| O17  | 2998(2)  | 7258.9(8)  | 4230.8(12) |
| O18  | 4849(2)  | 7334.9(7)  | 4026.2(11) |
| O19  | 3661(2)  | 7132.7(7)  | 3218.3(11) |
| O20  | 4098(2)  | 6745.2(7)  | 4066.3(12) |
| O21  | 4963(2)  | 8294.0(7)  | 2539.9(11) |
| O22  | 3936(2)  | 7755.1(7)  | 2607.2(12) |
| O23  | 5634(2)  | 7750.2(7)  | 2088.3(12) |
| O24  | 5583(2)  | 7818.3(7)  | 3185.4(12) |
| O25  | 6891(2)  | 7152.2(8)  | 2198.9(12) |
| O26  | 6539(2)  | 7171.3(7)  | 3289.1(12) |
| O27  | 7735(2)  | 6735.1(7)  | 2877.4(12) |
| O28  | 8244(2)  | 7355.2(7)  | 2884.7(12) |
| O29  | 3737(2)  | 7356.8(7)  | 1054.8(11) |
| O30  | 2965(2)  | 7186.0(7)  | 2020.7(11) |
| O31  | 4825(2)  | 7083.9(7)  | 1846.5(11) |
| O32  | 3495(2)  | 6732.8(8)  | 1296.3(13) |
| O1W  | 6503(3)  | 7237.6(9)  | 5244.0(14) |
| O2W  | 5997(3)  | 6645.9(9)  | 4711.1(13) |
| O3W  | -2332(3) | 6466.2(9)  | 4035.8(14) |
| O4W  | 1837(3)  | 6420.9(11) | 4263(2)    |
| O5W  | 5715(2)  | 8594.6(8)  | 3570.6(13) |
| O6W  | 2810(3)  | 8490.8(9)  | 2327.7(16) |
| O7W  | 1355(3)  | 8872.9(9)  | 3112.9(17) |
| O8W  | 1909(3)  | 8602.1(9)  | 6634.3(15) |
| O9W  | 4809(4)  | 6167.3(11) | 1475.6(19) |
| O10W | 3442(6)  | 5688.9(18) | 1224(4)    |
| O11W | 2039(5)  | 6265.7(19) | 1414(3)    |
| O12W | 1450(5)  | 6683.2(15) | 628(3)     |
| N1   | 71(3)    | 7654.6(9)  | 1076.1(16) |
| N2   | 4169(3)  | 8499.5(9)  | 713.7(15)  |
| N3   | -371(3)  | 6516.3(10) | 2519(2)    |
| N4   | 4052(3)  | 8494.1(9)  | 4278.8(16) |



|     |          |            |            |
|-----|----------|------------|------------|
| N5  | -1013(3) | 8716.1(9)  | 4423.6(15) |
| N6  | 4394(3)  | 6255.5(9)  | 3244.9(16) |
| C1  | 5361(4)  | 6372.7(13) | 2939(2)    |
| C2  | 3494(4)  | 6297.9(13) | 2830(2)    |
| C3  | 4473(4)  | 5901.9(11) | 3536(2)    |
| C4  | 3527(5)  | 5860.0(13) | 3935(3)    |
| C5  | 5440(5)  | 5885.8(14) | 3923(3)    |
| C6  | 4501(4)  | 5617.3(12) | 3072(2)    |
| C7  | 3613(5)  | 5229.5(13) | 3779(2)    |
| C8  | 3576(6)  | 5507.8(14) | 4241(3)    |
| C9  | 4505(6)  | 5495.8(15) | 4624(3)    |
| C10 | 5473(5)  | 5538.6(14) | 4257(3)    |
| C11 | 5524(5)  | 5256.5(14) | 3777(3)    |
| C12 | 4553(4)  | 5269.5(12) | 3383(2)    |
| C13 | 6405(7)  | 5531(2)    | 4662(4)    |
| C14 | 4580(6)  | 4989.2(14) | 2918(3)    |
| C15 | 3079(3)  | 8382.0(12) | 806(2)     |
| C16 | 4886(4)  | 8276.5(12) | 1066.5(19) |
| C17 | 4332(3)  | 8881.7(11) | 820.5(19)  |
| C18 | 3743(5)  | 9074.6(14) | 340(3)     |
| C19 | 3978(5)  | 8981.6(14) | 1427(3)    |
| C20 | 5480(4)  | 8965.4(13) | 760(2)     |
| C21 | 3936(6)  | 9460.9(16) | 421(4)     |
| C22 | 3526(6)  | 9554.1(19) | 1015(5)    |
| C23 | 4126(8)  | 9370(2)    | 1514(4)    |
| C24 | 5291(5)  | 9447.4(14) | 1457(3)    |
| C25 | 5670(4)  | 9350.6(14) | 848(2)     |
| C26 | 5072(5)  | 9543.4(16) | 383(3)     |
| C27 | 3734(7)  | 9470(2)    | 2113(4)    |
| C28 | 6826(6)  | 9431(2)    | 826(5)     |
| C29 | -465(5)  | 6596.9(15) | 1873(3)    |
| C30 | 482(4)   | 6730.0(14) | 2786(3)    |

|     |          |            |            |
|-----|----------|------------|------------|
| C31 | -310(4)  | 6136.1(13) | 2672(3)    |
| C32 | -1331(4) | 5971.2(12) | 2469(2)    |
| C33 | -191(5)  | 6092.4(14) | 3343(3)    |
| C34 | 593(4)   | 5963.3(14) | 2367(3)    |
| C35 | -1337(4) | 5591.3(13) | 2617(3)    |
| C36 | -1209(6) | 5550.3(15) | 3285(3)    |
| C37 | -192(6)  | 5712.7(15) | 3500(3)    |
| C38 | 688(6)   | 5538.9(18) | 3217(3)    |
| C39 | 631(5)   | 5580.5(15) | 2544(4)    |
| C40 | -412(4)  | 5421.7(14) | 2316(3)    |
| C41 | 1515(6)  | 5412.3(18) | 2260(4)    |
| C42 | -2354(5) | 5433.5(15) | 2395(3)    |
| C43 | 4317(4)  | 8223.5(12) | 4724(2)    |
| C44 | 3234(4)  | 8355.6(12) | 3866(2)    |
| C45 | 3798(3)  | 8841.9(11) | 4547.6(19) |
| C46 | 2793(4)  | 8832.7(13) | 4902(2)    |
| C47 | 4695(4)  | 8949.7(13) | 4952(2)    |
| C48 | 3687(4)  | 9099.8(11) | 4040.5(18) |
| C49 | 2586(4)  | 9189.3(14) | 5154(2)    |
| C50 | 3490(4)  | 9294.8(15) | 5554(2)    |
| C51 | 4490(4)  | 9305.3(14) | 5206(2)    |
| C52 | 4360(4)  | 9560.9(13) | 4700(2)    |
| C53 | 3477(4)  | 9459.8(12) | 4284(2)    |
| C54 | 2480(4)  | 9442.1(12) | 4645(2)    |
| C55 | 1760(11) | 9195(4)    | 5587(7)    |
| C56 | 5328(7)  | 9378(2)    | 5675(3)    |
| C57 | 3364(5)  | 9709.6(14) | 3782(3)    |
| C58 | -749(5)  | 8705.6(15) | 5077(2)    |
| C59 | -169(4)  | 8546.7(12) | 4090(2)    |
| C60 | -1328(3) | 9068.3(11) | 4193.4(18) |
| C61 | -2168(4) | 9212.3(14) | 4609(2)    |
| C62 | -402(3)  | 9311.5(11) | 4170(2)    |

|     |          |            |            |
|-----|----------|------------|------------|
| C63 | -1792(4) | 9026.2(12) | 3569.0(19) |
| C64 | -1247(4) | 9612.0(12) | 3320(2)    |
| C65 | -2178(4) | 9370.5(12) | 3328(2)    |
| C66 | -2992(4) | 9513.6(14) | 3747(2)    |
| C67 | -2530(4) | 9556.8(14) | 4364(2)    |
| C68 | -1606(4) | 9803.3(13) | 4342(2)    |
| C69 | -768(4)  | 9661.5(11) | 3937(2)    |
| C70 | 152(4)   | 9908.5(13) | 3903(3)    |
| C71 | -2650(4) | 9324.9(14) | 2707(2)    |
| C72 | -645(4)  | 7379.1(14) | 890(2)     |
| C73 | 788(4)   | 7529.6(13) | 1558(2)    |
| C74 | -467(4)  | 7993.1(11) | 1214.0(19) |
| C75 | -1251(4) | 8070.6(13) | 717.7(19)  |
| C76 | 348(3)   | 8274.6(12) | 1237(2)    |
| C77 | -1025(3) | 7976.9(11) | 1806.8(18) |
| C79 | -940(4)  | 8696.3(13) | 866(2)     |
| C80 | -144(4)  | 8622.9(12) | 1359(2)    |
| C81 | -714(4)  | 8595.9(12) | 1952(2)    |
| C82 | -1540(3) | 8319.8(12) | 1938.5(18) |
| C83 | -2326(4) | 8399.5(14) | 1438(2)    |
| C84 | -1768(4) | 8418.9(13) | 841(2)     |
| C85 | 681(4)   | 8899.1(13) | 1382(3)    |
| C86 | -2099(4) | 8298.1(13) | 2534(2)    |

## References

- (1) J.-Z. Qiu, L.-F. Wang and J. Jiang, SYSU-6, A New 2-D Aluminophosphate Zeolite Layer Precursor. *Molecules*, 2019, **24**, 2972.
